# Supplementary material for: FSH-blocking therapeutic for osteoporosis
Source: eLife. 2022 Sep 20;11:e78022. doi: 10.7554/eLife.78022 (PMC9550223; doi:10.7554/eLife.78022)
Supplement: Figure 1—figure supplement 1—source data 1. [file elife-78022-fig1-figsupp1-data1.xlsx]

## Sheet: Supp. Fig. 1A
Supplementary Figure 1A: Total body and femoral bone mineral density (BMD) of ovariectomized C3H/HeJ mice injected 18 weeks post-ovariectomy with human IgG or MS-Hu6 for 8 weeks
	Total body BMD (g/mm3)		Femur BMD (g/mm3)
	IgG	MS-Hu6	IgG	MS-Hu6
	0.0596	0.0605	0.1127	0.1195
	0.0583	0.0613	0.1132	0.1296
	0.0591	0.0616	0.1151	0.1274
	0.0583	0.0592	0.1171	0.1237
	0.0634	0.0609	0.1237	0.1193
	0.0627	0.0627	0.1277	0.1233
	0.0585	0.0599	0.1216	0.1237
	0.0604	0.0606	0.1294	0.1276
	0.0582	0.0599	0.1186	0.1129
	0.0634	0.0624	0.1298	0.1257
	0.0611	0.0623	0.1235	0.1246
	0.0612	0.0587	0.1302	0.1203
		0.0651		0.1398
Mean	0.06035	0.0611615	0.121883	0.124415
SEM	0.000577285	0.000472519	0.00188209	0.00176584
p value (vs. IgG)		0.284818		0.336274

## Sheet: Supp. Fig. 1C
Supplementary Figure 1C: Micro-CT analysis of fractional bone volume (BV/TV), trabecular number (Tb.N), trabecular spacing (Tb.Sp), trabecular thickness (Tb.Th) and connectivity density (Conn.D) of ovariectomized C3H/HeJ mice injected 18 weeks post-ovariectomy with human IgG or MS-Hu6 for 8 weeks
	BV/TV (%)		Tb.N (1/mm)		Tb.Sp (mm)		Tb.Th (µm)		Conn.D (mm3)
	IgG	MS-Hu6	IgG	MS-Hu6	IgG	MS-Hu6	IgG	MS-Hu6	IgG	MS-Hu6
	0.1241	0.1207	2.5976	2.4346	0.3769	0.4091	0.0684	0.075	25.2573	19.339
	0.1573	0.1633	2.5181	2.8053	0.3729	0.3287	0.0792	0.0748	37.5801	32.2839
	0.159	0.1367	2.7316	2.3413	0.3507	0.4145	0.0778	0.0706	25.4475	24.6314
	0.0982	0.1092	1.8531	2.5963	0.5472	0.3795	0.075	0.0703	11.0935	21.9523
	0.1188	0.2142	2.2709	3.1855	0.4253	0.2881	0.0684	0.0824	15.8913	54.1464
	0.1343	0.1502	2.4382	2.6644	0.3966	0.3593	0.0763	0.0682	27.8169	35.2189
	0.159	0.1031	2.4175	2.325	0.3962	0.4464	0.0815	0.0701	26.5264	19.0266
	0.1398	0.1503	2.2432	2.2343	0.4422	0.4203	0.0795	0.0895	18.9129	21.8918
	0.1577	0.1726	2.8069	2.4792	0.3346	0.3805	0.075	0.0821	25.5969	29.471
	0.1097	0.1429	2.5954	2.6701	0.3706	0.3516	0.0762	0.0781	12.1213	35.6375
	0.134	0.0868	2.6587	1.955	0.3542	0.5082	0.073	0.0755	26.0741	8.2748
		0.1761		2.6321		0.3633		0.081		36.1828
		0.143		2.8812		0.3332		0.0665		41.8203
Mean	0.135627	0.143777	2.46647	2.55418	0.397036	0.383285	0.0754818	0.0757	22.938	29.2213
SEM	0.00643878	0.0094667	0.0813041	0.0870125	0.0178264	0.0158412	0.00127805	0.00185863	2.34095	3.28459
p value (vs. IgG)		0.500344		0.474949		0.568881		0.926598		0.146634

## Sheet: Supp. Fig. 1D
Supplementary Figure 1D: Micro-CT analysis of cortical thickness (Ct.Th) of ovariectomized C3H/HeJ mice injected 18 weeks post-ovariectomy with human IgG or MS-Hu6 for 8 weeks
	Ct.Th (µm)
	IgG	MS-Hu6
	0.436	0.467
	0.461	0.472
	0.463	0.492
	0.474	0.492
	0.503	0.501
	0.496	0.48
	0.475	0.5
	0.487	0.518
	0.522	0.525
	0.516	0.508
	0.487	0.507
		0.509
		0.549
Mean	0.483636	0.501538
SEM	0.0076542	0.00615777
p value (vs. IgG)		0.0787507
