# Supplementary material for: FSH-blocking therapeutic for osteoporosis
Source: eLife. 2022 Sep 20;11:e78022. doi: 10.7554/eLife.78022 (PMC9550223; doi:10.7554/eLife.78022)
Supplement: Figure 1—source data 1. [file elife-78022-fig1-data1.xlsx]

## Sheet: Fig. 1A
Figure 1A: Two-dimensional histomorphometry parameters showing bone volume (B.Ar/T.ar), trabecular thickness (Tb.Th) and trabecular number (Tb.N) at femoral epiphyses of male FVB (Thermo) mice treated with human IgG or MS-Hu6 for 8 weeks
	B.Ar/T.Ar (%)		Tb.Th (µm)		Tb.N (1/mm)
	IgG	MS-Hu6	IgG	MS-Hu6	IgG	MS-Hu6
	28.9252	55.9659	69.1411	96.3354	2.15517	2.65587
	31.5214	41.5573	66.0381	92.4254	2.65252	2.65957
	40.8108	56.019	54.289	96.2519	1.9065	2.15517
	37.2267	40.6577	90.9885	95.2843	1.72414	2.42457
	22.0612	52.9936	66.4163	84.9919	2.75862	2.30212
	19.8012	46.477	59.8359	77.9485	2.26371	2.42457
	30.7746	42.5784	77.5507	87.3899	2.32238	2.95567
		40.9215		94.8595		1.92118
Mean	30.1602	47.1463	69.1799	90.6859	2.25472	2.43734
SEM	2.84534	2.40573	4.55717	2.35286	0.140535	0.11421
p value (vs. IgG)		0.00050513		0.000776398		0.326967

## Sheet: Fig. 1B
Figure 1B: Dynamic histomorphometry parameters showing mineral apposition rate (MAR), mineralizing surface (MS) and bone formation rate (BFR), as well as osteoclast surface (Oc.S/BS), at femoral epiphyses of male FVB (Thermo) mice treated with human IgG or MS-Hu6 for 8 weeks
	MAR (µm/d)		MS (%)		BFR (µm3/µm2/d)		Oc.S/BS (%)
	IgG	MS-Hu6	IgG	MS-Hu6	IgG	MS-Hu6	IgG	MS-Hu6
	1.02441	1.01289	0.0737112	0.16946	0.0755102	0.171645	20.5167	30.1271
	0.703767	1.32288	0.0629347	0.125166	0.0442914	0.16558	13.0935	14.499
	0.944588	1.26039	0.151417	0.114755	0.143027	0.144637	15.9238	18.3891
	0.4095	1.06126	0.0583863	0.166471	0.0239092	0.176668	21.9614	17.9944
	0.639319	1.37944	0.116959	0.135736	0.0747743	0.18724	26.1681	15.1749
	0.961026	0.988303	0.0813229	0.162882	0.0781534	0.160977	24.5835	24.5617
	0.433965	1.01194	0.178273	0.161523	0.0773642	0.163452	13.233	22.9935
	0.759209	1.56132	0.0466032	0.118254	0.0353816	0.184633
	1.07054		0.157351		0.168451
Mean	0.771813	1.1998	0.102995	0.144281	0.0800958	0.169354	19.3543	20.5342
SEM	0.0821964	0.075112	0.0163567	0.00819107	0.0159277	0.00489587	2.01398	2.12967
p value (vs. IgG)		0.00171401		0.0465782		0.000135518		0.694353

## Sheet: Fig. 1C
Figure 1C: Two-dimensional histomorphometry parameters showing bone volume (B.Ar/T.ar), trabecular thickness (Tb.Th) and trabecular number (Tb.N) at spine (L1-L3) of male FVB (Thermo) mice treated with human IgG or MS-Hu6 for 8 weeks
	B.Ar/T.Ar (%)		Tb.Th (µm)		Tb.N (1/mm)
	IgG	MS-Hu6	IgG	MS-Hu6	IgG	MS-Hu6
	28.0996	22.0879	53.008	68.7393	2.35749	1.95469
	13.1996	25.5211	58.6063	61.0073	1.52888	1.99637
	11.73	23.3321	52.2756	88.8641	1.22891	1.17555
	19.5946	18.9307	49.9198	77.6497	2.00973	1.96714
	20.4069	28.2146	50.0165	70.2942	1.95469	1.78036
	14.7747	28.7751	47.2878	67.6652	1.70861	1.5365
	14.5088	21.3705	42.659	85.3641	2.06819	1.91694
				79.9324		1.87649
				69.4556		1.44739
Mean	17.4735	24.0331	50.539	74.3302	1.83664	1.73905
SEM	2.14556	1.37654	1.87409	3.04735	0.142198	0.0957869
p value (vs. IgG)		0.0243989		2.38103e-05		0.564776

## Sheet: Fig. 1D
Figure 1D: Dynamic histomorphometry parameters showing mineral apposition rate (MAR), mineralizing surface (MS) and bone formation rate (BFR) at spine (L1-L3), as well as osteoclast surface (Oc.S/BS), of male FVB (Thermo) mice treated with human IgG or MS-Hu6 for 8 weeks
	MAR (µm/d)		MS (%)		BFR (µm3/µm2/d)		Oc.S/BS (%)
	IgG	MS-Hu6	IgG	MS-Hu6	IgG	MS-Hu6	IgG	MS-Hu6
	0.949745	1.17893	0.0718155	0.145268	0.0682064	0.17126	30.295	15.3211
	0.995461	1.26159	0.163665	0.119774	0.162923	0.151105	30.0058	19.2943
	0.714656	1.19542	0.149858	0.14501	0.107097	0.173349	15.2538	25.1168
	0.584771	0.910941	0.0591006	0.124769	0.0345603	0.113657	18.5267	17.7392
	0.933306	0.912713	0.0609013	0.0631271	0.0568395	0.0576169	24.3356	25.4417
	0.685566	1.09279	0.197593	0.170908	0.135463	0.186766	13.493	28.3611
	1.08376	1.04151	0.0865798	0.127089	0.0938315	0.132364	22.0311	13.5299
		0.994168		0.101402		0.100811	22.7923	31.6297
		1.32298		0.11506		0.152221		23.6667
Mean	0.849609	1.10123	0.112788	0.123601	0.0941314	0.137683	22.0917	22.2334
SEM	0.0704394	0.0495318	0.0213222	0.0101494	0.0170575	0.0137315	2.19114	2.03739
p value (vs. IgG)		0.00935155		0.629608		0.0637242		0.962807

## Sheet: Fig. 1E
Figure 1E: Serum FSH, LH, activin A and total inhibin levels in male FVB (Thermo) mice treated with human IgG or MS-Hu6 for 8 weeks
	FSH (ng/mL)		LH (ng/mL)		Activin A (pg/mL)		Total inhibin (ng/mL)
	IgG	Ms-Hu6	IgG	Ms-Hu6	IgG	Ms-Hu6	IgG	Ms-Hu6
	31.7059	15.8708	8.82984	0.825175	15.63	16.9047	1.427	3.1589
	4.90614	37.6797	2.80007	1.17362	9.09398	8.46446	0.2531	0.7707
	42.2856	23.2181	3.77345	6.40535	35.1138	3.16833	0.4032	1.879
	22.319	17.3061	2.09377	8.55978	38.0355	12.5386	0.8674	1.3569
	28.8064	12.5666	0.9202	6.20829	41.7874	30.7812	0.7946	1.1863
	21.6224	8.54826	4.34466	2.22508	10.914	0.771038	0.311	0.3964
	7.06859	6.87453	10.7301	2.31338	12.3102	8.46446
	10.2058	3.13834	6.76088	1.86234	35.9147
		3.69339		2.40009
Mean	21.115	14.3218	5.03162	3.55257	24.8499	11.5847	0.67605	1.45803
SEM	4.62962	3.66278	1.21346	0.919272	4.95195	3.79524	0.182683	0.398067
P-value (vs. IgG)		0.262858		0.340347		0.0581048		0.104504

## Sheet: Fig. 1F
Figure 1F: Total body and femoral bone mineral density (BMD) of ovariectomized C57BL/6 mice injected 18 weeks post-ovariectomy with human IgG or MS-Hu6 for 8 weeks
	Total body BMD (g/mm3)		Femur BMD (g/mm3)
	IgG	MS-Hu6	IgG	MS-Hu6
	0.0498	0.0496	0.0614	0.0653
	0.048	0.0511	0.0615	0.0694
	0.0496	0.0493	0.0629	0.0601
	0.0489	0.0488	0.0659	0.07
	0.0475	0.052	0.0608	0.0645
	0.0495	0.048	0.0617	0.0641
	0.0504	0.0507	0.0687	0.0704
	0.0488	0.0525	0.0615	0.0761
	0.048	0.0536	0.0632	0.0754
	0.052	0.0499	0.0647	0.0685
	0.0492	0.0524	0.0542	0.0745
Mean	0.0492455	0.0507182	0.0624091	0.0689364
SEM	0.000380039	0.00053169	0.00109141	0.00154362
p value (vs. IgG)		0.0356117		0.00251593

## Sheet: Fig. 1G
Figure 1G: Micro-CT analysis of cortical thickness (Ct.Th) fractional bone volume (BV/TV), trabecular number (Tb.N), trabecular spacing (Tb.Sp), trabecular thickness (Tb.Th) and connectivity density (Conn.D) of ovariectomized C57BL/6 mice injected 18 weeks post-ovariectomy with human IgG or MS-Hu6 for 8 weeks
	Ct.Th (µm)		BV/TV (%)		Tb.N (1/mm)		Tb.Sp (mm)		Tb.Th (µm)		Conn.D (mm3)
	IgG	MS-Hu6	IgG	MS-Hu6	IgG	MS-Hu6	IgG	MS-Hu6	IgG	MS-Hu6	IgG	MS-Hu6
	0.195	0.202	0.0203	0.0421	1.3354	1.9423	0.7701	0.5276	0.0683	0.0456	0.5958	22.2457
	0.2	0.208	0.019	0.0395	1.3385	1.8839	0.7853	0.5435	0.054	0.0593	1.3516	8.8254
	0.195	0.193	0.0183	0.0349	1.517	1.7649	0.6602	0.5771	0.0458	0.0539	5.0096	6.9877
	0.203	0.216	0.0303	0.0459	1.3789	1.7693	0.7033	0.5663	0.0623	0.0584	4.2378	14.7474
	0.21	0.205	0.0362	0.028	2.0518	2.1065	0.488	0.4743	0.0535	0.0533	5.3001	8.2042
	0.197	0.194	0.0212	0.0362	1.5947	1.6224	0.6384	0.6065	0.0556	0.0583	4.2419	7.4593
	0.194	0.217	0.0385	0.0523	2.122	2.3779	0.4677	0.4243	0.0473	0.0513	11.6334	12.7939
	0.192	0.232	0.0373	0.068	1.8208	2.3674	0.561	0.4188	0.0582	0.063	7.2566	22.3754
	0.208	0.216	0.0449	0.0236	1.9015	1.4821	0.5321	0.6765	0.0602	0.0609	7.453	3.2956
	0.199	0.222	0.0507	0.0476	1.641	2.0535	0.6225	0.4942	0.055	0.0563	9.7898	16.9917
Mean	0.1993	0.2105	0.03167	0.04181	1.67016	1.93702	0.62286	0.53091	0.05602	0.05603	5.68696	12.3926
SEM	0.00190933	0.00392216	0.0036759	0.00401825	0.0920698	0.093597	0.0350395	0.0255935	0.00212026	0.00162269	1.09183	2.08212
p value (vs. IgG)		0.0193767		0.079022		0.057116		0.048248		0.997053		0.0105808
