# Supplementary material for: FSH-blocking therapeutic for osteoporosis
Source: eLife. 2022 Sep 20;11:e78022. doi: 10.7554/eLife.78022 (PMC9550223; doi:10.7554/eLife.78022)
Supplement: Figure 2—source data 1. [file elife-78022-fig2-data1.xlsx]

## Sheet: Fig. 2A
Figure 2A: Pharmacokinetics of 89Zr-MS-Hu6 (250 µCi) in C57BL/6 mice
Time (h)	Percent injected dose per gram of blood
	Experiment 1					Experiment 2
0.0833333		7.59	7.546	3.38		11.744	5.238	12.858	34.675	11.948
0.5	36.261	15.083	15.277	5.2	18.638	15.078	7.488	16.328	47.456	20.783
1	30.363	14.539	16	9.475	22.957	14.893	11.193	20.558	37.449	19.139
2	17.454	15.356	14.045	11.234	21.29	15.52	11.462	16.925	27.147	17.305
4	18.085	17.122	17.037	11.516	8.357	15.218		16.368	24.767	15.386
24	12.236	18.185	13.328	7.454	12.306
48	8.504	10.925	10.355	8.035	10.849
72						8.334	7.448	7.925	7.142	7.8
120	7.198	8.272	6.924	5.946	7.569

## Sheet: Fig. 2B
Figure 2B: Pharmacokinetics of biotinylated MS-Hu6 (200 µg) in CD1 mice
Time (h)	Human IgG in serum (µg/mL)
2	67.6292	71.3433	52.7214
4	109.559	55.0189	21.7517
24	118.519	36.8018	24.0438
48	68.4393	19.5281	25.9042	29.1057
72	9.75792	6.69253
144	8.76397	5.6687	5.07099	3.88107
336	3.93236
720	12.0926
1440	6.80395	5.23421	3.53987	2.75017

## Sheet: Fig. 2C
Figure 2C: Pharmacokinetics of 89Zr-MS-Hu6 (250 µCi) in Tg32 mice
Time (h)	Percent injected dose per gram of blood
1	5.863	9.518	20.126	9.738	8.73
18	11.085	11.424	13.776	11.419	13.308
24	9.305	10.263	13.168	8.944	10.368
48	7.497	8.721	8.969	8.875	7.899
72	6.507	7.427	8.564	8.4	8.13
144	4.096	5.09	5.831	4.946	5.444
192	3.308	4.147	4.795	3.836	3.45
216	3.02	3.54	4.509	3.327	4.06
240	3.629	6.495	0.529	4.217	4.637

## Sheet: Fig. 2D
Figure 2D: Pharmacokinetics of MS-Hu6 (200 µg) in Tg32 mice
Time (h)	Human IgG in serum (µg/mL)
2		21.3339	26.2529	35.6126	21.1107
24	14.0558	19.4567	16.3184	23.5369	16.4862
48	13.0537	14.903	13.8594	16.3601
72	9.28226	12.397	11.572	14.1056	12.3421
96	8.83292	11.4482	11.23	11.8124	11.254
120	7.58607	13.4476	9.962	11.5844	9.13538
144	6.93878	6.46637	8.91173	10.4773	8.7206
168	6.38808	6.42409	8.24053	12.2876	6.49676
192	5.03743	6.24617	7.93727	8.50125	5.25452
216	4.1981	4.81496	6.27546	8.28062	5.11365
240	3.83524	3.83148	5.70501	7.48543	4.99033
264	4.31666	3.67947	4.90194	1.36685
288	3.96881	3.60336	5.02326	3.93413	3.8202
312	3.1499	3.6286	4.53191	3.144	3.16634
336	2.08811	2.62185	4.1981	3.10938	1.89993
Note: Three data points were excluded as they were more than 2.5 standard deviations from the group mean, resulting in a falsely elevated β phase t½. Cmax and β phase t½ have been recalculated.
