# Supplementary material for: FSH-blocking therapeutic for osteoporosis
Source: eLife. 2022 Sep 20;11:e78022. doi: 10.7554/eLife.78022 (PMC9550223; doi:10.7554/eLife.78022)
Supplement: Figure 3—source data 1. [file elife-78022-fig3-data1.xlsx]

## Sheet: Fig. 3B
Figure 3B: Quantitation of standardized value uptake units (normalized to muscle) in organs of mice treated with a single bolus dose of 89Zr–labeled MS-Hu6 (250 µCi) at 24, 48 and 72 hours
	Standardized uptake value (normalized to muscle)
	24 h					48 h				72 h
Liver	927.54	994.006	1124.14	1791.4	955.602	802.874	528.396	518.487	724.475	941.317	1717.27
Kidneys	544.98	542.985	557.286	704.646	475.568	364.789	252.429	226.132	328.856	194.431	419.982
Marrow	132.994	134.298	152.587	240.301	106.259	96.1293	60.8082	57.5519	99.3737	43.0264	111.667
Testis	194.49	171.28	167.94	222.532	164.223	118.376	82.6658	74.7827	126.737	47.5885	139.237
Subcutaneous white adipose tissue	272.006	271.715	255.978	199.988	170.003	157.24	168.057	110.772	113.819	27.3752	-2.8698
Visceral white adipose tissue	96.1012	34.4259	40.315	76.5721	34.2959	45.2142	-4.02809	37.0306	106.791	-46.6366	15.7274
Brain	130.701	162.863	184.939	107.653	167.837	67.3964	55.6916	60.8115	146.528	-18.1482	92.6343
Note: 5 mice were injected with 89Zr-MS-Hu6 at each time point. At 48 h, only 4 animals were scanned due to loss of antibody in one animal resulting from a bleed at the injection site. At 72 h, only 2 animals were scanned.

## Sheet: Fig. 3C
Figure 3C: Radioactivity (γ–counts) in perfused tissues isolated from mice treated with a single bolus dose of 89Zr–labeled MS-Hu6 (250 µCi) at 24, 48 and 72 hours
	Percent injected dose (per gram tissue)
	24 h					48 h				72 h
Liver	3.7415	3.3133	4.5045	5.4111	3.1407	5.3742	4.6008	4.0024	6.904	6.078	6.367	6.9613	7.848	7.4787
Spleen	7.2592	3.7773	8.7168	8.7259	2.307	7.3678	5.2082	5.2136	11.958	4.86	3.726	4.8776	7.1004	4.8275
Marrow	5.4751	3.101	4.9264	6.5345	1.8428	5.1631	3.8462	3.3449	5.077	4.211	3.166	3.9058	6.3192	3.6236
Lung	2.4454	2.3216	3.6811	3.8975	0.9868	3.5307	2.54	1.9415	5.872	1.696	0.804	2.0407	1.1509	2.4966
Kidney	3.089	2.1445	3.0314	3.7689	1.4187	2.9314	3.0094	2.4255	5.723	3.512	2.538	2.5361	2.2183	2.2892
Heart	2.1535	1.6523	2.3308	2.4869	1.1009	1.4868	1.3299	1.9142	3.248	1.259	0.707	1.1205	1.0106	1.0481
Adrenal	2.6664	1.9507	2.2262	3.6234	1.1045	1.9688	2.8168	1.9419	2.468	1.089	1.317	1.2806	1.8476	2.0805
Testis	0.2197	1.7321	2.3278	3.1257	1.197	2.064	1.9535	1.8516	3.265	1.496	1.383	1.6625	1.8715	1.6478
Subcutaneous white adipose tissue	1.8608	0.9961	1.6572	1.3307	0.7444	1.8801	1.6009	1.5297	3.902	1.335	0.899	1.0254	1.2956	0.6701
Visceral white adipose tissue	0.9155	0.4282	0.8625	0.7818	0.3098	0.6172	0.6372	0.7128	1.508	0.545	0.383	0.3546	0.5303	0.3233
Brown adipose tissue	1.7694	1.2733	1.7275	1.6031	1.6592	2.4384	1.9418	1.0045	3.688	2.337	1.242	1.6317	1.7386	2.4476
Muscle	0.5444	0.3653	0.5713	0.466	0.2847	0.7051	0.6539	0.5923	1.065	0.397	0.379	0.4353	0.5439	0.4094
Bone	0.9287	0.6288	0.9249	1.0349	0.2996	1.0778	0.968	0.9356	1.396	1.06	0.891	0.8575	1.3758	0.8379
Pancreas	0.847	0.4519	0.8695	0.9529	0.3388	0.8435	0.5896	0.5054	0.897	0.682	0.486	0.4267	0.5582	0.4441
Brain	0.0769	0.0544	0.0678	0.1012	0.043	0.0938	0.0647	0.0502	0.102	0.073	0.055	0.0468	0.0639	0.0564
Note: 5 mice were injected with 89Zr-MS-Hu6 at each time point. At 48 h, only 4 animals were scanned due to loss of antibody in one animal resulting from a bleed at the injection site.

## Sheet: Fig. 3E
Figure 3E: Time course of excretion of 89Zr–labeled MS–Hu6 in feces
Time (h)	Percent injected dose per gram excreta
0.0833333				0.045
0.5				0.01
1	0.001		0.002		0.002
2	0.047	0.044	0.026		6.805
4	11.296	2.362	3.092	5.032	2.252
24	16.562	6.568	5.839	5.164
48	4.38	6.213	2.991	2.927
120	1.659	2.591	1.972	1.702	2.187
Note: The missing data represent the absence of feces at those time points

## Sheet: Fig. 3G
Figure 3G: IVIS imaging and quantitation (average radiance) of isolated perfused tissues following AF750-MS-Hu6, AF750 or PBS injection
	Average radiant efficiency ([p/s/cm2/sr]/[µW/cm2]), x 108
	PBS			AF750			AF750-MS-Hu6
Liver	16.4	13.9	12.3	11.8	27.3	24.8	271.4	168.8	154.6
Spleen	3.53	3.2	0.95	1.925	1	1.03	2.335	3.725	0.36
Kidney	1.4	1.3	2.5	23.4	16.37	13.67	12.9667	30.3667	24.7333
Heart	1.57	2.2	1.8	1.12	1.24	1.3	3.94333	4.64333	2.78667
Adrenal	1.8	1.15	1.03	1	1.06	1.12	0.51	1.8	3.6
Testis	3.6	3.3	2.7	1.39	1.48	1.61	11.13	25.9	22.7
Subcutaneous white adipose tissue	2.8	3.9	2.6	1.19	1.46	1.3	16.7	41.8	38.7
Gonadal white adipose tissue	4.2	2.8	2.4	0.973	1.1	1.11	4.82667	19.5667	16.4333
Brown adipose tissue	1.9	1.29	1.33	1.36	1.23	1.2	4.49	2.7	0.8
Muscle	2.2	1.19	2.17	0.855	0.869	0.871	1.31	5.1	2.9
Bone	8.5	7.34	5.7	1.1	1.15	1.04	8.07	3.12	4.06
Brain	4.4	3.02	3.15	1.59	1.63	1.58	3.43667	7.77667	4.25333

## Sheet: Fig. 3J
Figure 3J: Quantitation of whole body PET/CT (standard uptake values) of multiple organs and serum radioactivity (γ–counts) following a single i.v. injection of 89Zr-MS-Hu6 (1.3 mg, ~1.3 mCi) in two Cynomolgus monkeys aged 14 and 15 years, respectively
	Standardized uptake value (normalized to muscle)
	48 h		120 h
Liver	16.2175	6.72588	24.8327	9.50309
Gall bladder	12.3754	3.22277	20.3618	6.46017
Kidney	5.54861	3.44541	5.56558	3.18483
Marrow	0.428445	0.513815	0.280967	0.366018
Bone	0	0.009628	0	0
Spleen	3.65411	2.6408	2.1324	2.7138
Subcutaneous adipose tissue	0.36794	0.346786	0.498746	0.270994
Visceral white adipose tissue	0.38577	0.960922	0.391014	0.545353
Gonadal white adipose tissue	1.67741	2.71565	0.218572	2.45102
Brown adipose tissue	0.829529	0.877011	0.480819	1.39179
Brain	0.444232	0.367952	0.146499	0.360761
Muscle	0.383773	0.17839	0.080583	0.134409
	Percent injected dose per gram tissue
	0.5 h		48 h		120 h
Blood	0.326282	0.328037	0.00523846	0.00528476	0.000398858	0.00870075
