# Supplementary material for: FSH-blocking therapeutic for osteoporosis
Source: eLife. 2022 Sep 20;11:e78022. doi: 10.7554/eLife.78022 (PMC9550223; doi:10.7554/eLife.78022)
Supplement: Figure 4—source data 1. [file elife-78022-fig4-data1.xlsx]

## Sheet: Fig. 4A
Figure 4A: Physiological parameters (monitored up to 100 minutes) after injecting 89Zr-MS-Hu6 as a single i.v. bolus dose (1.3 mg, ~1.3 mCi) into the tail veins of Cynomolgus monkeys (“Andy”, 14 years/9.8 kg, and “Scott”, 15 years/6.15 kg)
Heart Rate (beats per minute)				Respiratory Rate (breaths per minute)				Mean Blood Pressure (mm Hg)				Systolic Pressure (mm Hg)				Diastolic Pressure (mm Hg)				Rectal Temperature (oF)
Time (min)	Monkey 1 ("Scott")	Monkey 2 ("Andy")		Time (min)	Monkey 1 ("Scott")	Monkey 2 ("Andy")		Time (min)	Monkey 1 ("Scott")	Monkey 2 ("Andy")		Time (min)	Monkey 1 ("Scott")	Monkey 2 ("Andy")		Time (min)	Monkey 1 ("Scott")	Monkey 2 ("Andy")		Time (min)	Monkey 1 ("Scott")	Monkey 2 ("Andy")
0	115	104		0		26		0	85	82		0	121	122		0	67	62		0	99	99
5	131	128		5	28	24		5				5	151			5	91			5	97.7	97.7
10		100		10		23		10		90		10		124		10		73		10		98.1
15		99		15		22		15		90		15		145		15		73		15		98.7
20	115	94		20	16	25		20	89	112		20	118	145		20	75	96		20	97.7	98
25		93		25		26		25		86		25		113		25		73		25		98
30	105	92		30	24	24		30	83	89		30	106	118		30	71	75		30	96.3	98
35	120	87		35	24	20		35	89	86		35	124	111		35	72	74		35	96.9	98.3
40		86		40		23		40		99		40		120		40		88		40		98.2
45	115	90		45	20	23		45	107	101		45	146	124		45	88	90		45	96.1	98.1
50		95		50		22		50		102		50		117		50		96		50		98.1
55	111	89		55	20	26		55	103			55	137			55	89			55	95.9	98.1
60		89		60		25		60		90		60		155		60		58		60		98
65	103	89		65	24	22		65	106	95		65	162	119		65	78	83		65	95.9	97.9
70	108	87		70	20	21		70	106	96		70	146	129		70	76	79		70	95.4	98.1
75		90		75		23		75		106		75		127		75		95		75		98
80	109	95		80	20	22		80	85	107		80	115	134		80	70	93		80	95.1	98.3
85	102			85	20			85	97			85	132			85	80			85	94.9
90	99			90	20			90	102			90	143			90	82			90	94.6
100	95			100	20			100	88			100	113			100	76			100	95

## Sheet: Fig. 4B
Figure 4B: Serum biochemistry (at days 0, 2 and 5) after injecting 89Zr-MS-Hu6 as a single i.v. bolus dose (1.3 mg, ~1.3 mCi) into the tail veins of Cynomolgus monkeys (“Andy”, 14 years/9.8 kg, and “Scott”, 15 years/6.15 kg)
Calcium (mg/dL)					Phosphorous (mg/dL)					Alanine aminotransferase (ALT) (IU/L)					Alkaline phosphatase (ALP) (IU/L)					Gamma-glutamyl transferase (GGT) (IU/L)
	Pre-injection	Day 2	Day 5			Pre-injection	Day 2	Day 5			Pre-injection	Day 2	Day 5			Pre-injection	Day 2	Day 5			Pre-injection	Day 2	Day 5
Monkey 1 ("Scott")	7.9	6.8	7.4		Monkey 1 ("Scott")	3.8	4.3	3.7		Monkey 1 ("Scott")	15	16	26		Monkey 1 ("Scott")	125	97	109		Monkey 1 ("Scott")	44	37	38
Monkey 2 ("Andy")	5.5	8.1	7.6		Monkey 2 ("Andy")	5.7	5	4.9		Monkey 2 ("Andy")	3	18	15		Monkey 2 ("Andy")	60	86	84		Monkey 2 ("Andy")	13	35	27
Total Bilirubin (mg/dL)					Albumin (g/dL)					Total Protein (g/dL)					Creatinine (mg/dL)					Blood urea nitrogen (BUN) (mg/dL)
	Pre-injection	Day 2	Day 5			Pre-injection	Day 2	Day 5			Pre-injection	Day 2	Day 5			Pre-injection	Day 2	Day 5			Pre-injection	Day 2	Day 5
Monkey 1 ("Scott")	0.2	0.1	0.2		Monkey 1 ("Scott")	3.3	2.6	3.1		Monkey 1 ("Scott")	6.2	5.2	5.9		Monkey 1 ("Scott")	0.4	0.3	0.4		Monkey 1 ("Scott")	24	18	18
Monkey 2 ("Andy")	1.1	0.2	0.2		Monkey 2 ("Andy")	3.4	3.6	3.5		Monkey 2 ("Andy")	5.5	6.3	6.2		Monkey 2 ("Andy")	0	0.1	0		Monkey 2 ("Andy")	19	16	16
Glucose (mg/dL)					Cholesterol (mg/dL)					Triglycerides (mg/dL)
	Pre-injection	Day 2	Day 5			Pre-injection	Day 2	Day 5			Pre-injection	Day 2	Day 5
Monkey 1 ("Scott")	58	59	65		Monkey 1 ("Scott")	123	94	111		Monkey 1 ("Scott")	76	53	49
Monkey 2 ("Andy")	49	83	60		Monkey 2 ("Andy")	136	93	111		Monkey 2 ("Andy")	23	35	33

## Sheet: Fig. 4D
Figure 4D: ELISpot assays for the inflammatory cytokines IFNγ and IL2 in human peripheral blood mononuclear cell cultures in response to CEFT peptide pool, DMEM control or MS-Hu6
	IFNγ			IL2
	Spot forming units per 105 PBMCs			Spot forming units per 105 PBMCs
CEFT	8	8	6	9.2	7.2	8.2
DMEM control	2	1	0	1.2	2.2	1.2
MS-Hu6	0	0	1	0	1	0

## Sheet: Fig. 4E
Figure 4E: Kaplan-Meier survival curves of male and female heterzygous Fshr+/- mice and wild type littermates
	Number of events (deaths)
Time (days)	Male Fshr+/+	Male Fshr+/-	Female Fshr+/+	Female Fshr+/-
449		1
671		1
712		1
730		1
738			1
754		1		1
776		1
788	1	1
790	1
799				2
819			1	1
826				1
830		2
846		1
853				1
855		1
860				1
861				1
863				1
867			2	1
868		1
872			1
881		1		1
882			1
887				1
905		1
906		1
910		1		1
916		1
918		1
930	1
931				1
933			1
938	1
939		1
973				1
988				1
989	1			1
993		1
996		1
1007				1
1010				2
1011			1
1049				1
1057		1
1084			1
1111		1
1135			1
1145				1
