# Supplementary material for: FSH-blocking therapeutic for osteoporosis
Source: eLife. 2022 Sep 20;11:e78022. doi: 10.7554/eLife.78022 (PMC9550223; doi:10.7554/eLife.78022)
Supplement: Figure 5—source data 1. [file elife-78022-fig5-data1.xlsx]

## Sheet: Fig. 5
Figure 5: Comparison of twelve physicochemical parameters (Protein-Sol Abpred) that were computationally–derived for MS-Hu6 against experimental derivations of 48 FDA–approved antibodies and 89 antibodies in late–stage (phase 2/3) clinical development
		CSI		AC		CIC		SMAC		ELISA		AS		HIC		SGAC		PSR		BVP		HEK		DSF		META
	name	Experimental value (Transformed value)	Predicted value (Transformed value)	Experimental value (Transformed value)	Predicted value (Transformed value)	Experimental value (Transformed value)	Predicted value (Transformed value)	Experimental value (Transformed value)	Predicted value (Transformed value)	Experimental value (Fold over background)	Predicted value (Fold over background)	Experimental value (Monomer % loss)	Predicted value (Monomer % loss)	Experimental value (min)	Predicted value (min)	Experimental value (mM)	Predicted value (mM)	Experimental value (Score)	Predicted value (Score)	Experimental value (Fold over background)	Predicted value (Fold over background)	Experimental value (mg/L)	Predicted value (mg/L)	Experimental value (Tm, oC)	Predicted value (Tm, oC)	Group X meta value	Group Y meta value
	MS-Hu6		0.0925518		-0.340703		-0.301942		-0.509284		1.85859		0.0453335		9.51287		1002.86		0.366433		5.8249		158.389		74.6378	44.8529	17.6471
	Scrambled		-5.10834		1.01722		1.34169		-1.84594		2.95437		0.041173		7.88183		969.16		0.477682		5.57894		63.986		67.8595	54.4118	1.47059
FDA-Approved	adalimumab	0.0732517	-0.0672711	-0.211987	0.31701	0.0182976	-0.0782237	-0.715253	0.00386837	1.08	1.43367	0.05	0.0451184	8.8	9.67167	900	856.477	0	0.287162	1.49	2.26664	134.9	147.2	71	70.6315	28.4672	16.0584
	alemtuzumab	-0.516021	-0.0384129	-1.42802	-1.09041	-1.15479	-0.69307	-0.715253	-0.985336	1.16	2.19571	0.06	0.0453699	8.8	9.11019	1000	924.823	0	0.33	1.46	3.1366	144.7	147.534	74.5	74.615	16.0584	10.9489
	alirocumab	0.0732517	-0.760753	-0.156153	-0.377299	-0.211987	-0.0538197	-0.715253	0.210514	1.2	1.30241	0.03	0.0445351	9	9.8882	900	855.397	0	0.204811	2.18	2.66407	69.2	135.634	71.5	70.526	36.4964	18.9781
	atezolizumab	1.15479	0.28835	0.878704	0.512063	1.4807	0.145761	1.84051	0.565248	1.29	1.50149	0.06	0.0454935	13.4	10.6311	300	324.899	0.07	0.178891	6.2	5.37593	164.1	155.386	73.5	70.9946	77.3723	92.7007
	basiliximab	0.484914	0.3566	1.15479	1.53557	0.634818	0.595274	-1.45386	-0.509794	1.2	2.26114	0.05	0.0448804	9.6	9.76076	0	79.4193	0.4	0.458894	2.14	4.58997	107.5	113.801	60.5	67.6053	67.1533	46.7153
	belimumab	-1.13715	-0.422765	-0.374504	-0.611538	-0.739087	-0.156259	0.601593	-0.0798259	3.61	2.4602	0.13	0.0454371	10.5	9.74776	800	765.584	0	0.237382	12.23	7.41983	10.5	138.953	60	68.4041	41.6058	62.7737
	bevacizumab	-0.516021	-0.195372	-0.374504	-0.0663579	0.977206	0.186862	1.08624	1.14733	1.29	1.32156	0.22	0.0453132	11.8	11.463	700	663.218	0	0.138949	2.78	2.69212	50	137.531	63.5	71.6327	44.5255	80.292
	brentuximab	-1.13715	-0.237305	-1.038	-0.0580812	-0.739087	-0.64289	-0.715253	0.0405545	4.21	3.29878	0	0.0449809	10.5	10.7469	800	755.094	0.25	0.280986	2.24	2.6631	268.1	193.701	72	70.8859	43.0657	45.2555
	canakinumab	0.484914	-0.0956656	-0.434076	-0.76323	-0.739087	-0.636999	-0.715253	-0.170265	1.2	1.22551	0.04	0.0454916	9.3	9.70605	800	760.93	0	0.144142	2.55	2.04763	45.7	150.585	72	72.2434	38.6861	30.6569
	certolizumab	0.0732517	-0.138651	-0.590666	0.0265689	0.505598	0.156718	1.00714	0.934142	1.14	1.22433	0.04	0.0445852	11.5	11.1341	500	524.328	0	0.211626	1.65	2.04763	186.7	169.504	81.5	71.2674	35.0365	83.2117
	cetuximab	-1.74899	-0.967383	-0.100802	-0.816118	0.0182976	-0.0774937	0.0457574	0.376555	1.09	1.15344	0.05	0.0450002	10.1	10.4067	400	432.755	0	0.196108	1.09	1.44585	109.2	140.783	68.5	71.8667	21.1679	61.3139
	daclizumab	-0.516021	0.219997	-0.715253	0.022276	-1.15479	-0.0523383	-0.240144	-0.214325	1.18	1.41726	0.03	0.0455417	9.3	9.98793	900	864.249	0	0.319891	1.41	2.98193	245.1	139.271	74	72.009	21.1679	28.4672
	daratumumab	0.484914	-0.181364	0.0182976	-0.536561	0.0182976	-0.0776741	0.0457574	0.0875063	1.21	1.20818	0.06	0.0452145	9.5	10.3593	800	769.388	0	0.160073	3.15	2.94572	233.3	160.953	71	69.0271	48.9051	43.0657
	denosumab	1.4807	0.273847	0.547636	-0.0777287	-0.211987	0.0890799	-1.45386	-0.434276	5.92	4.52822	0.01	0.0453817	8.5	9.68325	1000	455.596	0	0.306639	17.75	11.4783	134.2	157.292	69.5	70.0825	67.1533	5.10949
	dinutuximab	-0.516021	-0.00413445	0.384335	0.455493	0.634818	0.539	0.24957	-0.787462	1.03	1.57731	0.01	0.0458671	9.8	9.60639	800	751.32	0.3	0.37545	1.69	2.48538	76.4	93.5148	69	68.4181	46.7153	49.635
	eculizumab	-1.74899	-0.191512	-0.646048	-0.622443	-1.15479	-0.506085	0.601593	0.286009	0.96	1.07974	0.01	0.044885	10.4	10.6603	700	679.408	0	0.228726	3	2.90997	226.5	161.857	66	69.9826	19.708	66.4234
	efalizumab	-0.516021	0.0793469	-0.434076	-0.15142	-1.15479	-0.0892955	-1.45386	-0.272422	0.98	1.36085	0	0.0455202	8.7	9.85894	900	843.644	0	0.302359	1.24	2.26111	167	135.729	72.5	72.0319	16.0584	11.6788
	elotuzumab	-1.13715	-0.0937986	-0.775649	-0.309915	-1.15479	-0.530362	0.601593	0.132197	0.98	1.06529	0	0.0447779	10.3	10.1746	700	663.93	0	0.204371	1.26	1.81059	213.2	164.259	83.5	71.4737	12.4088	65.6934
	evolocumab	0.0732517	-0.22071	0.174702	0.376001	0.505598	0.601667	0.424045	0.293981	1.75	1.57718	0.03	0.0445225	10.4	10.302	700	694.967	0.2	0.346439	1.75	2.36758	260.7	139.517	65	68.5466	59.854	63.5036
	gemtuzumab	0.0732517	-0.518932	-0.24957	-0.999798	0.354949	-0.189324	1.45386	-0.0268479	1.08	1.12695	0.05	0.0449613	12.3	10.3069	500	536.15	0	0.219105	1.7	1.56181	171.3	154.441	72.5	72.0178	37.9562	87.5912
	golimumab	0.0732517	-0.160468	1.05381	0.62606	1.74899	0.394056	1.21	0.177035	1.31	1.83559	0.06	0.0448789	11.4	10.2606	0	38.5284	0.23	0.292443	2.71	3.52064	163.2	156.899	70	70.2781	71.5328	88.3212
	infliximab	1.08624	-0.158814	1.53784	0.602452	0.211987	-0.0100422	0.0457574	-0.423926	1.04	1.37277	0.18	0.0457669	10.4	9.60137	0	53.6792	0	0.26074	1.37	1.6087	6.6	99.968	64.5	66.545	48.1752	69.3431
	ipilimumab	0.715253	0.0794338	0.680243	0.193111	1.60049	0.305181	1.28991	-0.156508	1.05	1.45275	0.04	0.0453759	11.6	9.98868	400	444.054	0.23	0.283789	1.69	2.31648	169.6	154.586	73	70.5693	59.854	86.1314
	ixekizumab	1.4807	0.464752	0.933882	0.244209	0.865323	0.0509035	0.424045	-0.10706	8.8	6.44292	0.16	0.0463095	10.9	10.0204	500	540.207	0.81	0.321707	10.4	7.40117	97.3	115.185	83	73.3666	90.5109	73.7226
	mepolizumab	-1.74899	-0.190709	-2.01604	-0.972012	-1.79288	-0.280191	-0.240144	-0.131231	1.13	1.27169	0.04	0.0450114	9.2	10.0326	900	859.632	0	0.28775	1.05	2.06849	221.5	136.506	78.5	73.0689	11.6788	27.0073
	mogamulizumab	-0.516021	-0.218746	-1.038	-0.18622	-0.739087	0.064627	-0.240144	0.269102	1.12	1.23179	0.04	0.0454917	9.6	10.4208	800	767.299	0	0.169654	2.17	2.38413	89.8	134.327	68.5	70.6102	28.4672	40.146
	muromonab	0.715253	-0.037467	0.221353	0.88813	0.211987	0.307857	-1.45386	-0.274068	1.41	1.91143	0.04	0.0454128	8.9	9.86084	1000	-283.483	0.18	0.430238	3.94	3.78572	113.5	119.793	74.5	70.2018	67.8832	8.75912
	natalizumab	0.0732517	0.0512237	-0.374504	-0.0921273	-0.211987	-0.308318	-0.240144	-0.100297	1.06	1.4273	0.02	0.0448897	9.7	9.90831	900	843.056	0	0.336087	1.52	2.12027	251.7	163.674	79.5	73.9349	33.5766	35.0365
	necitumumab	-0.516021	0.0732538	-0.100802	-0.176717	-0.211987	0.223017	0.839017	0.836362	1.05	1.2776	0.02	0.0453454	10.8	11.2629	600	622.909	0	0.245079	1.31	2.94815	198.6	166.932	76.5	72.6218	29.1971	74.4526
	nimotuzumab	-0.516021	-0.312554	-1.1912	-1.14945	-1.15479	-0.809329	0.0457574	0.170878	1.32	1.38668	0.04	0.0454587			900	893.816	0	0.116964	3.42	3.14863	15.1	134.263	65.5	73.6336
	nivolumab	0.0732517	-0.105187	0.24957	-0.0716371	0.0182976	-0.0703467	-0.715253	-0.879213	1.15	1.54202	0.03	0.0450293	9	8.88494	900	866.334	0.14	0.303929	1.32	1.86521	178.8	149.694	66	69.6248	46.7153	19.708
	obinutuzumab	0.0732517	0.0725509	0.0182976	-0.0604116	-0.211987	0.130466	0.24957	0.421771	0.95	1.05851	0.01	0.0450098	10.6	10.7678	600	624.691	0.11	0.239192	1.63	2.02214	176.4	149.723	73	71.6238	39.4161	66.4234
	ofatumumab	-0.516021	-0.301332	-0.156153	0.0311726	0.434076	0.157262	0.703488	0.0585039	1.12	1.27704	0.03	0.0449514	9.7	10.0143	800	765.238	0	0.282545	1.18	2.18986	249.8	154.576	68	69.5178	35.0365	52.5547
	omalizumab	-0.516021	-0.0549458	-0.905948	0.661029	-1.15479	-0.0696221	-0.715253	0.376877	1.12	1.1603	0.05	0.045768	9.5	10.3866	800	767.882	0	0.279943	1.17	1.77001	150.4	144.095	77.5	71.001	22.6277	33.5766
	palivizumab	-1.13715	0.184984	-1.67015	-0.589548	-1.15479	-0.857508	-0.715253	-0.68502	1.12	1.68388	0.04	0.0448998	9.3	9.3703	900	847.382	0	0.263568	2.88	3.61286	243.1	162.705	79.5	74.7466	27.7372	24.8175
	panitumumab	-1.13715	-0.153154	-2.44219	-0.802543	-1.79288	-1.03914	-0.240144	0.0729168	1.06	1.12043	0.04	0.0454271	9.5	10.0366	900	867.594	0	0.218846	1.18	1.48459	179.6	161.003	78.5	73.7273	13.1387	32.1168
	pembrolizumab	0.715253	-0.0258819	0.526501	-0.19323	1.60049	0.0616097	1.35574	0.165796	1.28	3.214	0.03	0.0455517	11.1	10.4689	500	534.27	0.3	0.21724	2.23	3.56357	64.9	128.392	66	71.4006	72.2628	82.4818
	pertuzumab	-1.74899	-0.0232223	-0.775649	-0.28943	-0.739087	-0.204494	0.0457574	0.44088	1.21	1.25154	0.04	0.0451338	10.1	10.5017	700	664.258	0	0.188366	1.69	1.90058	31.4	161.65	78.5	73.2742	29.927	56.2044
	ramucirumab	-0.516021	-0.0105494	-0.646048	0.165987	-0.739087	-0.543262	-0.715253	-0.222233	1.05	1.17095	0.02	0.0443359	9.4	9.35975	900	899.37	0	0.204071	1.25	1.95674	90.7	160.55	66	70.5709	26.2774	25.5474
	ranibizumab	0.892243	-0.0333606	0.657361	0.288011	1.10289	0.101896	1.70824	1.12654	1.61	1.40369	0.09	0.0455165	12.1	11.4618	300	327.912	0	0.158715	3.14	2.64053	41.4	141.726	65	72.0962	70.8029	89.781
	reslizumab	0.484914	-0.301997	-0.00914841	-0.252081	0.0182976	-0.0947087	0.0457574	0.536687	1.25	1.31576	0.06	0.044979	9.8	10.521	700	683.014	0.23	0.228696	2.02	2.60709	191.6	159.596	75.5	70.8386	57.6642	53.2847
	rituximab	0.0732517	0.130235	0.119209	1.27101	1.10289	1.00668	0.424045	-0.0770954	1.19	1.42318	0.03	0.0446201	10.8	10.6774	700	683.354	0.38	0.459833	2.93	3.34082	164.1	158.878	69	69.5819	65.6934	65.6934
	secukinumab	-1.74899	-0.194656	-1.1912	0.261362	-1.79288	0.282741	0.0457574	0.937287	1.09	1.29615	0.05	0.0462514	11.4	10.9862	800	780.972	0	0.191065	1.69	2.12051	149	151.025	72	71.4201	20.438	58.3942
	siltuximab	0.0732517	0.00890532	0.306631	1.0079	0.634818	0.771512	1.11986	0.794919	1.18	1.29128	0.01	0.0444751	11	11.3103	600	566.169	0	0.265948	1.55	2.22315	95.7	120.385	64.5	66.3419	51.8248	78.1022
	tocilizumab	0.484914	0.312022	-0.100802	0.129739	0.0182976	-0.0191914	-0.240144	-0.386099	1.14	1.5471	0.05	0.0453199	9.1	9.56678	900	847.582	0	0.45553	2.81	4.13794	139.6	142.766	91.5	73.9255	52.5547	25.5474
	trastuzumab	-0.516021	0.0952725	0.0640818	0.0266797	-0.211987	-0.124419	-0.240144	-0.0190845	1.06	1.31873	0.04	0.0451603	9.7	9.91641	800	763.362	0	0.268115	1.34	1.70054	159.5	157.335	78.5	72.8277	36.4964	40.8759
	ustekinumab	0.0732517	0.3555	-0.516021	-0.304337	-0.739087	-0.44547	-1.45386	-0.242218	2.18	2.05022	0.02	0.0447093	8.8	9.98099	1000	786.667	0.15	0.312463	5.07	5.80899	152.7	158.983	69.5	71.9985	57.6642	8.0292
	vedolizumab	-0.516021	0.0742159	-0.516021	-0.35336	0.211987	-0.00396211	1.15479	0.464257	1.15	1.15313	0.07	0.0456413	10.9	10.7788	600	605.945	0	0.23469	1.58	1.85393	221.8	147.828	80.5	72.1047	41.6058	77.3723
Phase 3	anifrolumab	-0.516021	0.121983	-1.1912	-0.723197	-1.15479	-0.770438	-1.45386	0.061499	1.16	1.8265	0.07	0.0454643	8.8	10.1599	700	736.588	0	0.180856	1.62	3.49679	82	166.605	62.5	71.3981	18.2482	24.8175
	bapineuzumab	1.15479	0.0581342	-1.28991	0.0767533	-0.739087	0.0432371	-0.715253	-0.324116	1.21	1.44472	0.07	0.045529	8.9	9.51774	1000	859.689	0	0.2622	3.55	2.73962	151.1	123.745	73	71.331	40.146	12.4088
	bavituximab	0.0732517	-0.0121842	2.44219	0.546216	2.01604	-0.124861	1.21	0.0136931	1.32	1.65443	0.04	0.0455586	11.5	9.99924	0	57.0848	0.56	0.240817	1.69	2.44164	45.1	117.215	59.5	70.1544	72.2628	91.2409
	benralizumab	0.0732517	0.208302	0.569019	0.0107346	0.865323	0.0602433	0.424045	-0.281132	1.23	1.82112	0.02	0.0456092	9.5	9.8684	800	804.189	0.35	0.375414	1.42	2.35527	146.7	145.651	76	74.0615	59.1241	48.9051
	bimagrumab	1.37904	0.316822	1.53784	1.33505	2.18082	0.799755	-0.240144	-0.114924	1.55	1.67281	0.09	0.0448291	10.1	9.88741	0	83.6079	0.7	0.44789	5.33	5.22717	150.2	156.502	72	70.4906	88.3212	62.7737
	bococizumab	2.18082	0.696076	1.53784	0.806466	1.37904	0.255236	0.424045	-1.22863	13.5	12.345	0.07	0.0453223	10.2	8.92309	0	78.0115	0.76	0.503311	18.88	16.2496	95.8	126.582	67	70.0687	95.6204	73.7226
	briakinumab	0.892243	0.0603373	1.53784	0.851518	1.24896	0.450108	-0.715253	-0.769783	4.83	3.79989	0.11	0.0455935	9.4	9.05913	0	86.4508	0.56	0.427687	10.22	7.94829	122	128.291	71.5	71.6628	89.0511	48.9051
	brodalumab	0.0732517	0.375372	0.739087	0.0828047	0.211987	0.0322601	-0.715253	-0.58336	1.48	1.95106	0.02	0.0449418	9.1	9.36174	900	865.434	0.27	0.380844	2.93	3.99084	150.9	150.65	74.5	70.4861	64.9635	21.1679
	crenezumab	0.484914	-0.126237	0.590666	-0.302115	0.0182976	0.114229	-0.715253	0.340082	1.13	1.41513	0.05	0.0456346	10	10.5205	700	712.153	0.1	0.205946	2.78	3.34124	149.3	143.016	72	70.5794	54.7445	45.9854
	dupilumab	0.0732517	-0.179313	0.703488	-0.42804	0.977206	-0.0795786	0.24957	0.493757	8.69	9.16496	0.03	0.0451857	10.2	10.4726	700	647.083	0.15	0.238102	19.27	18.3158	163.5	152.612	76.5	72.1579	77.3723	60.5839
	epratuzumab	0.0732517	-0.245316	0.325866	0.235295	-0.464435	-0.0351769	-1.45386	-0.244929	1.47	1.72811	0.03	0.0451798	9.2	9.86244	900	848.569	0.13	0.266153	2.34	2.35834	78.2	122.161	65	70.795	53.2847	17.5182
	farletuzumab	0.0732517	-0.0328287	-1.038	0.084462	-0.464435	0.313856	0.424045	0.586046	1.07	1.19727	0.01	0.0451187	9.5	10.8266	800	766.792	0	0.183321	1.32	1.82324	220.8	151.993	75.5	70.8724	23.3577	48.1752
	fasinumab	-0.516021	0.011752	-1.28991	-1.62631	-1.79288	-1.2568	-0.715253	-0.499135	1.16	1.19402	0.07	0.0455042	10	9.52543	900	861.269	0	0.18755	2.53	2.09399	110.4	155.581	71	70.7696	24.8175	33.5766
	figitumumab	0.892243	0.0206509	1.53784	0.347052	1.31123	0.210413	0.839017	-0.0352162	2.89	2.32932	0.06	0.046029	10.7	9.74129	0	220.952	0.38	0.290447	5.65	3.58691	119.9	141.674	66.5	71.478	86.1314	81.0219
	fulranumab	0.484914	0.0277831	0.80061	0.316352	0.505598	-0.120134	0.601593	0.459865	1.85	1.57879	0.07	0.0454134	9.3	10.2148	900	865.635	0.19	0.180488	6.92	5.47661	142	140.64	68.5	70.1914	75.1825	40.8759
	ganitumab	0.0732517	-0.0450176	0.464435	-0.108341	0.775649	0.39587	-0.240144	-0.0464569	1.3	1.31233	0.01	0.0451387	9.3	10.2632	800	751.424	0.55	0.326089	4.91	3.79044	229.4	139.457	78.5	71.0294	72.2628	35.7664
	gantenerumab	1.37904	0.172873	0.612592	1.00405	-0.464435	0.601142	-2.44219	-0.0592449	13.82	10.0776	0.07	0.0452794	9	10.1371	1000	328.35	0.55	0.407375	22.75	17.5989	162.7	156.052	77.5	70.2713	81.0219	6.56934
	gevokizumab	-1.13715	0.185429	-1.038	-0.373264	-0.739087	-0.642988	-1.45386	-0.664945	1.18	1.50029	0.07	0.0448776	8.8	9.13362	1000	864.306	0	0.304321	1.93	3.5929	136.4	130.943	71.5	72.0839	25.5474	7.29927
	girentuximab	-1.74899	-0.15267	-1.42802	0.0592946	-1.15479	-0.636857	-0.715253	-0.532846	1.09	1.98504	0.03	0.0444647	9.1	8.87053	1000	1160.93	0	0.227606	1.39	3.01022	30.7	116.605	63	70.5028	13.8686	15.3285
	guselkumab	0.892243	0.243276	0.354949	0.777081	1.10289	0.652908	0.526501	0.226983	1.54	1.60894	0.19	0.0446676	11.4	10.635	700	665.958	0.47	0.352959	5.87	4.67835	167.3	161.825	69.5	70.936	79.562	71.5328
	ibalizumab	-1.13715	-0.152116	-0.839017	-0.170418	-0.464435	-0.32245	0.775649	0.554745	0.99	1.14229	0.04	0.0449447	10.2	10.5786	800	755.62	0	0.220366	1.13	1.60214	133.3	139.59	72	72.2627	16.0584	60.5839
	inotuzumab	0.715253	-0.0194591	0.404111	0.689868	0.505598	0.601552	0.424045	0.107834	3.18	2.54699	0.03	0.0455502	9.7	10.3021	800	760.207	0.25	0.345256	5.4	4.6569	169.8	139.317	83	71.7332	75.9124	50.365
	lampalizumab	-1.13715	0.155071	-0.484914	-0.392931	-1.15479	-1.05893	-0.240144	-0.781369	1.11	2.20339	0.09	0.0450114	9.3	9.35794	800	774.089	0	0.33281	1.34	3.28753	187.1	170.637	67	71.8331	20.438	35.0365
	lebrikizumab	-1.74899	-0.402614	-0.558296	-0.777099	0.354949	-0.74443	1.5684	-0.075461	0.96	1.14748	0	0.0443339	12.4	10.0385	500	543.255	0	0.288195	1.46	2.63585	61.6	151.773	66	71.3644	24.8175	88.3212
	lintuzumab	-0.516021	-0.17229	-0.297057	-0.694596	0.0182976	-0.354389	0.680243	-0.210423	1.05	1.16915	0.05	0.0448067	10.9	9.95314	700	684.846	0	0.248349	1.25	1.46713	230	157.551	75.5	71.4488	27.7372	70.073
	motavizumab	0.0732517	0.157393	0.277988	-0.785669	-0.464435	-1.04804	-0.240144	-0.567507	1.23	1.57196	0.04	0.0444804	9.7	9.39513	800	812.369	0	0.170556	5.36	3.92633	133.6	139.868	86	74.2171	52.5547	40.8759
	ocrelizumab	0.715253	-0.0653651	0.905948	0.405458	0.775649	0.588792	-0.240144	0.305007	1.13	1.60686	0.02	0.0450032	9.9	10.7893	300	359.741	0	0.30422	1.67	2.57301	137.8	145.573	70.5	71.1005	55.4745	58.3942
	onartuzumab	-0.516021	-0.153415	-0.646048	-0.142789	0.0182976	0.12725	0.0457574	0.529194	1.12	1.15974	0.04	0.0448787	9.9	10.8065	800	770.483	0	0.250737	1.19	1.94305	147.9	141.6	80	72.098	30.6569	47.4453
	otelixizumab	-0.516021	-0.515198	0.424045	0.0619099	-0.464435	-0.393889	-0.715253	0.201184	1.13	1.37976	0.09	0.0453669	9.1	9.79328	1000	671.193	0	0.123487	1.4	2.56938	152.1	114.781	75.5	70.1747	37.2263	16.0584
	patritumab	1.02245	-0.319045	0.826079	0.189324	0.634818	0.538715	0.601593	0.245341	2.35	3.21698	0.05	0.0448945	10.2	10.5085	600	609.188	0.52	0.313411	4.35	4.16518	68.8	135.931	71.5	70.4571	81.0219	68.6131
	rilotumumab	0.484914	-0.053795	0.119209	0.27098	1.24896	0.677801	1.63433	0.641644	1.13	1.226	1.27	0.0450263	12.6	11.2334	500	458.507	0.16	0.331093	2.37	2.68977	173.1	167.26	79	72.0445	60.5839	88.3212
	romosozumab	-1.13715	-0.068335	-2.01604	-0.50023	-1.79288	-0.905501	-1.45386	-0.0318889	1.01	1.19447	0.03	0.0447911	9.2	9.73432	1000	810.567	0	0.229301	1.47	2.39157	227.7	147.935	76	72.7716	16.0584	12.4088
	sarilumab	0.0732517	-0.161523	-0.211987	-0.576358	-0.464435	-0.560298	-0.715253	-0.494832	1.19	1.30038	0.05	0.0449147	9	9.10928	900	862.542	0	0.15081	2.17	2.18688	181.8	147.665	64	68.2248	45.2555	19.708
	sirukumab	1.26917	-0.0120973	1.53784	0.385563	1.4807	0.339951	1.00714	1.02079	2.17	1.86828	0.04	0.0446197	11.3	11.5612	0	9.72557	0.36	0.225285	9.66	5.9929	109.8	159.853	68	67.5403	89.0511	85.4015
	tabalumab	0.0732517	-0.0824139	0.0640818	0.845721	0.354949	0.793243	0.839017	0.434562	1.26	1.58394	0.06	0.0452886	10.8	10.8745	700	657.39	0	0.38054	3.68	3.98424	121.6	157.794	64	72.0198	59.1241	69.3431
	tanezumab	0.0732517	-0.196226	0.174702	-0.470865	0.434076	-0.303388	0.948125	0.361853	1.4	1.30374	0.02	0.0452082	12.4	10.5001	700	654.569	0.23	0.244188	4.83	3.30316	48.9	154.72	75.5	74.7534	67.8832	76.6423
	teplizumab	0.892243	-0.00649702	0.739087	-0.0766711	0.634818	-0.0991276	-1.45386	-0.655019	1.67	2.29904	0.06	0.0456923	8.8	9.187	1000	606.87	0.31	0.360208	3.84	4.00818	150.9	146.118	64.5	74.8673	77.3723	7.29927
	tildrakizumab	0.0732517	0.210477	-0.374504	-0.354064	-0.464435	-0.255062	0.839017	0.0222324	1.19	1.32903	-0.01	0.0452126	11.1	10.2621	600	626.74	0	0.236065	1.77	2.12877	181.9	159.669	77.5	71.1286	44.5255	76.6423
	tralokinumab	1.31123	0.012916	0.464435	0.0349952	-0.211987	-0.307809	0.24957	-0.0566624	1.29	1.28501	0.01	0.0446186	10.3	9.68397	800	738.197	0.16	0.231838	2.32	3.06917	121.4	142.047	63	70.4998	64.2336	52.5547
	tremelimumab	0.484914	0.18966	1.53784	0.657928	1.74899	0.253725	1.84051	0.483684	1.21	1.44293	0.02	0.0450203	11.6	10.5156	0	71.8369	0.15	0.302068	1.97	3.58691	229.6	151.586	75	72.6896	70.8029	90.5109
	visilizumab	0.715253	0.284431	1.02245	0.969575	0.354949	0.259062	-0.715253	-0.35217	1.88	2.29147	0.06	0.0448544	9	9.83303	0	93.7258	0.42	0.391481	4.8	4.20232	242	137.843	71	70.9982	78.8321	44.5255
	zalutumumab	-1.13715	0.195728	-1.42802	-0.201097	-1.79288	-0.544954	-0.715253	0.238689	1.28	1.75472	0.05	0.0451628	9.3	9.89635	900	841.669	0	0.169342	2.9	4.46817	200.5	143.559	72.5	71.9181	34.3066	24.8175
Phase 2	abituzumab	0.484914	-0.0990442	-0.0366013	-0.76503	-0.739087	-0.435701	-0.715253	0.347822	1.14	1.1681	0.06	0.0451546	9.2	10.4766	900	843.935	0.17	0.214072	2.72	3.66126	89.6	152.229	75.5	72.1336	48.1752	21.1679
	abrilumab	-0.516021	0.352821	-1.67015	-0.568918	-1.79288	-0.999174	-0.715253	-0.519217	1.12	1.49007	0.03	0.0452545	9.4	9.657	900	857.715	0	0.25819	1.82	3.62133	100.2	156.112	71	69.1767	14.5985	24.8175
	blosozumab	2.01604	0.715834	0.775649	-0.0291606	0.0182976	-1.21181	-1.45386	-0.761722	13.18	8.4568	0.13	0.0452634	9.2	9.32083	600	629.652	0.21	0.214242	12.85	9.69154	120	137.989	70.5	71.4231	81.0219	32.1168
	carlumab	-0.516021	0.458083	-0.905948	0.0372615	-0.739087	-0.618715	0.601593	0.345013	2.76	3.08794	0.07	0.0463146	11.2	10.6341	700	668.49	0.21	0.236659	8.88	8.176	243.3	178.523	69.5	70.1687	51.0949	72.9927
	cixutumumab	1.79288	0.245507	1.53784	0.154188	0.905948	-0.0466221	0.948125	0.472196	3.77	2.75782	0.16	0.0456156	11.8	10.5485	0	5.70314	0.66	0.27008	11.9	9.96077	154.3	160.558	73.5	72.0617	91.2409	89.781
	clazakizumab	-1.13715	-0.535758	-0.297057	-0.220112	-0.464435	-0.692726	0.0457574	0.212036	1.28	1.3264	0.05	0.0446684	9.6	9.74685	800	814.132	0	0.215436	4.12	4.58598	113.5	160.845	69.5	70.0218	36.4964	45.2555
	codrituzumab	0.0732517	0.415748	-0.839017	-0.106598	-1.15479	-0.00187975	-1.45386	-0.41013	9.42	5.82348	0.26	0.0461443	8.8	10.0157	1000	333.733	0.15	0.312704	14.87	9.8341	66.3	106.3	73	72.415	54.7445	6.56934
	dacetuzumab	-1.74899	0.0603373	-0.646048	0.563098	-1.15479	0.443122	-1.45386	-0.530114	1.08	1.69707	0	0.0457114	8.5	9.59683	1000	385.864	0	0.365121	1.34	3.38489	128.5	134.25	68	70.5123	13.1387	4.37956
	dalotuzumab	1.67015	0.110531	0.852096	0.0384168	0.354949	0.297634	-0.715253	-0.0125445	2.9	2.17302	0.15	0.0455746	9.9	10.4752	800	754.432	0.4	0.340475	8.25	5.43374	82.4	151.233	77	74.6625	82.4818	39.4161
	drozitumab	1.02245	-0.326521	1.53784	1.08182	-0.211987	0.112263	-0.715253	0.187087	1.1	1.23475	0.03	0.0446175	9.3	9.69286	0	13.992	0	0.260401	1.48	2.0716	22.1	147.418	63	68.4186	45.2555	47.4453
	duligotuzumab	2.44219	0.43048	1.53784	0.558388	0.775649	-0.619857	0.0457574	-0.305192	8.54	5.24042	0.06	0.0456031	10.2	9.86865	0	39.4987	0.33	0.326943	9.63	7.49199	192.6	172.248	67.5	68.3071	89.0511	67.8832
	eldelumab	-0.516021	-0.13953	-0.156153	-0.447363	1.1912	-0.0658263	2.18082	0.396278	1.11	1.28934	0.1	0.0450965	12.4	10.427	500	530.827	0	0.172185	1.75	1.99391	89.3	147.214	59.5	70.5281	37.9562	89.781
	emibetuzumab	1.15479	0.355346	1.53784	0.5519	0.775649	0.262234	-0.715253	-0.444936	3.3	2.47481	0.04	0.0450092	9.6	9.51279	0	92.9563	0.64	0.395507	8.33	5.8249	98.7	124.273	71.5	71.5172	88.3212	52.5547
	enokizumab	-0.516021	0.366417	-0.0366013	-0.0421354	0.211987	-0.262567	1.05381	0.452007	1.17	1.52001	0.09	0.0458808	12.9	10.9745	600	630.52	0.13	0.220947	3.24	3.98768	239.8	152.705	68	72.1153	48.9051	85.4015
	etrolizumab	-1.13715	-0.261017	0.0640818	-0.530144	-0.211987	-0.154585	-0.240144	-0.0464566	2.18	1.71778	0.2	0.0452387	9.3	9.9264	900	859.805	0.42	0.20194	4.23	3.1162	173.8	148.914	76	71.0346	57.6642	28.4672
	fezakinumab	-0.516021	0.0757247	0.277988	-0.00490669	1.89273	-0.029682	1.40311	0.457016	1.15	1.37503	0.07	0.0454415	11.8	10.3987	600	617.927	0.26	0.213589	2.15	2.87293	141.5	147.788	69	71.7989	56.9343	85.4015
	ficlatuzumab	-0.516021	-0.370754	-1.67015	-0.501461	-1.15479	-0.230704	0.0457574	0.110129	1.13	1.45857	0.05	0.0454078	9.4	10.3214	900	863.325	0	0.261679	1.23	1.76669	249	138.962	75	70.5804	16.7883	35.0365
	fletikumab	-0.516021	-0.0369102	-0.715253	-0.645669	-1.15479	-0.579429	0.424045	0.40889	1.02	1.16162	0.02	0.04556	11	10.491	700	664.646	0	0.214193	1.41	1.7324	220.4	159.291	71.5	70.9171	18.2482	67.8832
	foralumab	0.484914	0.392864	1.11986	1.27944	0.505598	0.667021	-1.45386	-0.915869	4.77	5.05688	0.04	0.0452209	9.8	9.19542	0	71.154	0.37	0.432391	4.71	4.34937	174.4	142.747	66	68.7264	79.562	48.9051
	fresolimumab	-0.516021	0.324941	-1.038	-0.607609	-1.15479	-0.694543	0.424045	0.206139	1.3	2.02216	0.06	0.0456829	10.9	10.4044	700	656.454	0	0.264252	3.51	5.54921	166	172.287	74	70.611	35.0365	67.1533
	galiximab	-0.516021	-0.360877	-0.211987	-0.222696	0.0182976	0.0246892	1.50866	0.972695	1.21	1.33584	0.03	0.0449403	12.2	11.243	600	628.577	0	0.255285	3.81	4.24283	174.1	167.81	67.5	72.1676	43.7956	86.1314
	glembatumumab	0.715253	-0.32693	1.1912	0.468311	2.44219	0.976112	2.18082	0.801602	1.06	1.49722	0.3	0.045085	13.7	11.3626	0	14.5729	0.17	0.334823	2.22	2.80946	152.7	147.517	70.5	71.3583	64.9635	96.3504
	imgatuzumab	0.0732517	-0.175145	-0.297057	-0.380649	0.211987	-0.0047448	0.0457574	-0.621946	5.01	4.09601	0.07	0.0452361	10.1	9.65544	800	755.738	0	0.381695	11.77	9.34576	187.7	149.331	71.5	72.0826	59.1241	50.365
	lenzilumab	0.892243	0.500321	1.53784	0.87123	1.10289	0.404582	-1.45386	-1.2999	14.46	12.5075	0.03	0.0456159	8.7	8.87605	0	82.6605	0.66	0.495078	19.6	15.4185	184.7	151.228	74	70.9401	93.4307	33.5766
	lirilumab	1.02245	0.118881	0.962564	-0.469546	1.37904	-0.4311	2.18082	0.748609	1.27	1.62682	0	0.0452682			300	325.04	0.18	0.167322	3.55	6.36908	270.5	171.058	70	70.5349
	lumiliximab	-0.516021	-0.13064	-0.0640818	-0.378263	-0.211987	-0.115548	-0.240144	-0.102266	1.14	1.2978	0.07	0.0450911	9.5	9.79897	800	761.271	0.14	0.229188	2.22	2.51317	86.3	144.902	64.5	69.854	43.7956	37.9562
	matuzumab	-1.13715	-0.193777	-1.67015	-0.231664	-0.739087	-0.385151	-0.240144	0.304122	1.06	1.12267	0.02	0.0450321	9.8	10.256	900	870.996	0	0.171533	1.03	1.60605	224.3	121.648	72	70.9322	13.8686	35.7664
	mavrilimumab	0.0732517	0.50676	-1.42802	0.0886431	-1.15479	-0.33361	-0.715253	-0.118408	1.21	3.10064	0.05	0.0459991	10.3	10.4729	700	662.968	0	0.388436	2.16	7.40117	150.5	156.768	68.5	69.206	33.5766	48.9051
	olaratumab	-0.516021	-0.234142	-0.558296	0.242913	0.634818	0.656272	0.24957	0.929636	1.32	1.29893	0.29	0.0452063	10.6	11.4278	700	655.83	0.48	0.274768	2.58	2.23415	141.9	148.204	62.5	71.06	58.3942	62.0438
	olokizumab	-1.13715	-0.768831	-1.038	-0.554483	-0.464435	-0.476092	0.24957	0.339406	1.11	1.68718	0.04	0.0450356	9.9	10.4102	700	655.915	0	0.217475	1.23	2.32384	115.3	152.895	69	69.5813	21.8978	55.4745
	otlertuzumab	-1.13715	-0.198896	0.221353	-0.151795	0.775649	0.293499	0.905948	-0.205357	1.17	1.19473	0.07	0.0450295	11	10.4226	600	632.418	0	0.272045	1.78	1.89265	149.6	150.963	68.5	69.2449	45.2555	76.6423
	ozanezumab	1.89273	0.0403594	1.08624	-0.533228	0.211987	0.0904353	-1.45386	-0.620054	2.03	1.97869	0.06	0.0450289	10	9.74749	0	74.8392	0.77	0.389056	4.45	3.72973	97.1	133.747	67	70.3349	82.4818	51.0949
	panobacumab	0.0732517	0.0975873	-0.905948	0.16629	0.211987	0.216229	0.0457574	-0.4916	1.21	2.09427	0.02	0.0451036	9.8	9.38281	900	861.645	0	0.273947	1.9	2.25012	107.6	114.798	69	69.5822	44.5255	39.4161
	parsatuzumab	1.5684	-0.300092	0.634818	-0.240574	-0.464435	-0.396006	-0.240144	0.312461	10.05	9.21163	0.09	0.0456905	9.1	9.96334	900	827.357	0.13	0.195869	17.4	17.9841	40	121.547	64.5	73.5494	75.9124	25.5474
	pinatuzumab	-0.516021	-0.0264138	-0.464435	-0.281945	-0.211987	-0.248848	-0.240144	-0.124698	1.27	1.30779	0.07	0.0451175	9.2	9.77578	800	772.967	0.01	0.154524	2.49	1.94305	130.6	136.893	79	70.4489	46.7153	34.3066
	polatuzumab	-2.44219	-0.0752933	-2.01604	-0.115785	-2.44219	-0.688777	-0.715253	-0.55027	1.36	2.34014	0.06	0.0455157	8.8	9.75661	1000	564.498	0	0.329334	3.62	4.26646	225.1	178.091	74	69.8314	30.6569	13.8686
	ponezumab	-1.13715	0.693518	-0.775649	0.0741185	-0.464435	0.0326543	0.24957	-0.345524	3.13	3.83818	0.16	0.0459725	10.5	9.94747	800	780.003	0.07	0.413287	6.62	7.41798	17	133.027	61	73.66	49.635	54.7445
	radretumab	0.484914	0.17946	0.354949	-0.321417	0.0182976	0.00743053	-0.715253	-0.140131	1.26	1.65076	0	0.0457092	9.5	10.2709	900	868.903	0.13	0.228096	3.29	4.9556	151.2	157.495	77	70.3528	62.0438	27.7372
	robatumumab	1.67015	0.284962	1.53784	0.469675	0.977206	0.111847	0.24957	-0.721854	5.22	4.2272	0.05	0.0460488	9.5	9.19133	0	76.5218	0.27	0.33747	8.25	8.07842	117.1	135.157	80	69.929	89.0511	62.7737
	seribantumab	0.715253	0.059643	0.992061	0.613607	0.977206	0.512167	0.24957	0.604487	1.24	1.40237	0.15	0.0460602	10.4	10.4953	300	380.207	0	0.292382	2.97	2.39157	190	161.597	77.5	70.6207	68.6131	70.073
	sifalimumab	-0.516021	0.437406	0.119209	0.328563	0.211987	0.25084	-0.240144	-0.455783	2.6	2.44066	0.01	0.0454035	9.7	9.70184	800	771.293	0.06	0.415054	2.5	3.33267	158.6	164.868	67	71.4037	57.6642	40.8759
	simtuzumab	0.484914	-0.135941	-0.297057	-0.0724579	0.354949	0.258424	0.727119	-0.0183984	6.01	3.63144	0.14	0.0450654	10.4	10.4272	800	763.547	0.34	0.282105	10.41	6.01112	191.4	143.455	66.5	70.0382	73.7226	59.1241
	tigatuzumab	0.0732517	0.423398	0.505598	0.38537	-0.464435	-0.0443555	-0.715253	-0.28338	1.17	1.49454	0	0.0450502	10	9.46624	700	673.019	0.13	0.335269	1.7	2.55962	179	146.807	64.5	71.4961	51.0949	45.9854
	tovetumab	0.0732517	0.0867184	0.174702	0.269504	-0.211987	0.0367579	-1.45386	-0.550934	1.35	2.23723	0.01	0.0449262	8.7	9.37066	900	860.428	0	0.383825	2.95	3.46904	277.2	154.871	63.5	70.5121	57.6642	9.48905
	urelumab	1.22925	-0.223904	1.53784	0.321782	0.634818	0.39092	1.28991	0.706365	1.15	1.17531	0.01	0.0453095	11.2	11.252	0	19.4829	0	0.249368	1.53	2.65362	143.9	158.547	66	69.9002	62.7737	86.1314
	veltuzumab	-0.516021	-0.0471585	0.464435	-0.149146	-0.211987	0.0475625	0.751163	0.187466	0.89	1.10328	0.04	0.0448112	11.1	10.5939	700	734.134	0	0.252865	1.21	1.58595	225	152.38	70	71.6576	36.4964	70.073
